# Supplementary material for: Fabrication of high B-doped ordered mesoporous carbon with 4-hydroxyphenylborate phenolic resin for supercapacitor electrode materials
Source: Royal Society of Chemistry journal article supplement (doi:10.1039/d0ra00561d), 2020-01-01
Supplement: d0ra00561d1.pdf [file d0ra00561d1.pdf]

<Supplementary information>

**Fabrication of high B-doped Ordered mesoporous carbon with 4-hydroxyphenylborate phenolic resin for supercapacitor electrode materials**

By Yan Zhang\*, Fengsong Qi and Yujian Liu

\*Corresponding author, Tel: +86 21 64252394; E-mail: [yzhang@ecust.edu.cn](mailto:yzhang@ecust.edu.cn)

1. The solubility of 4-hydroxyphenylboronic acid-modified resin (0.15-HPBPF), boronic acid-modified resin (BPF), and pure phenolic resin (PF).

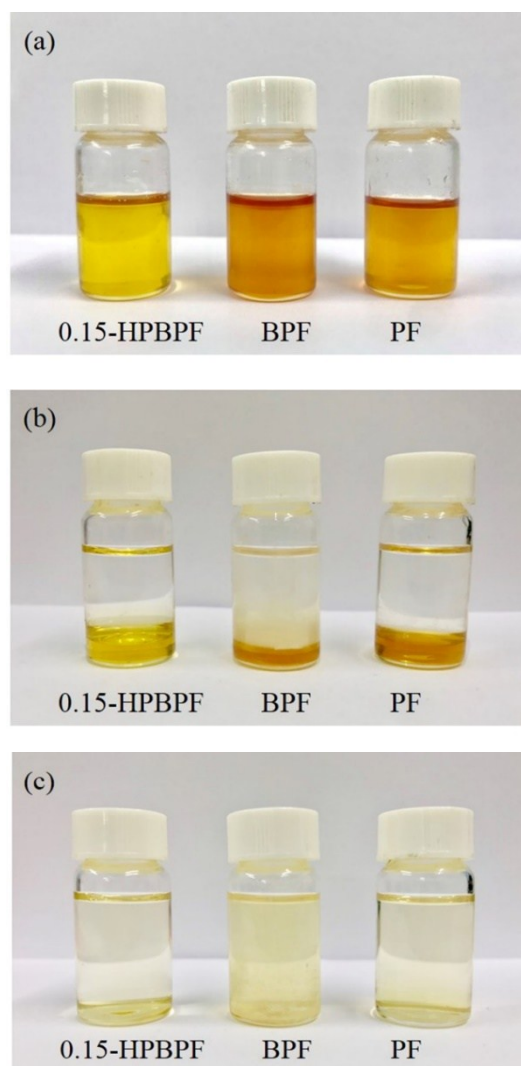

**Figure S1** (a) resins before the dissolution, (b) dissolving resins in the ethanol, and (c) resins after the dissolution.

## 2. GCD curves of the HPB-OMCs at different current density.

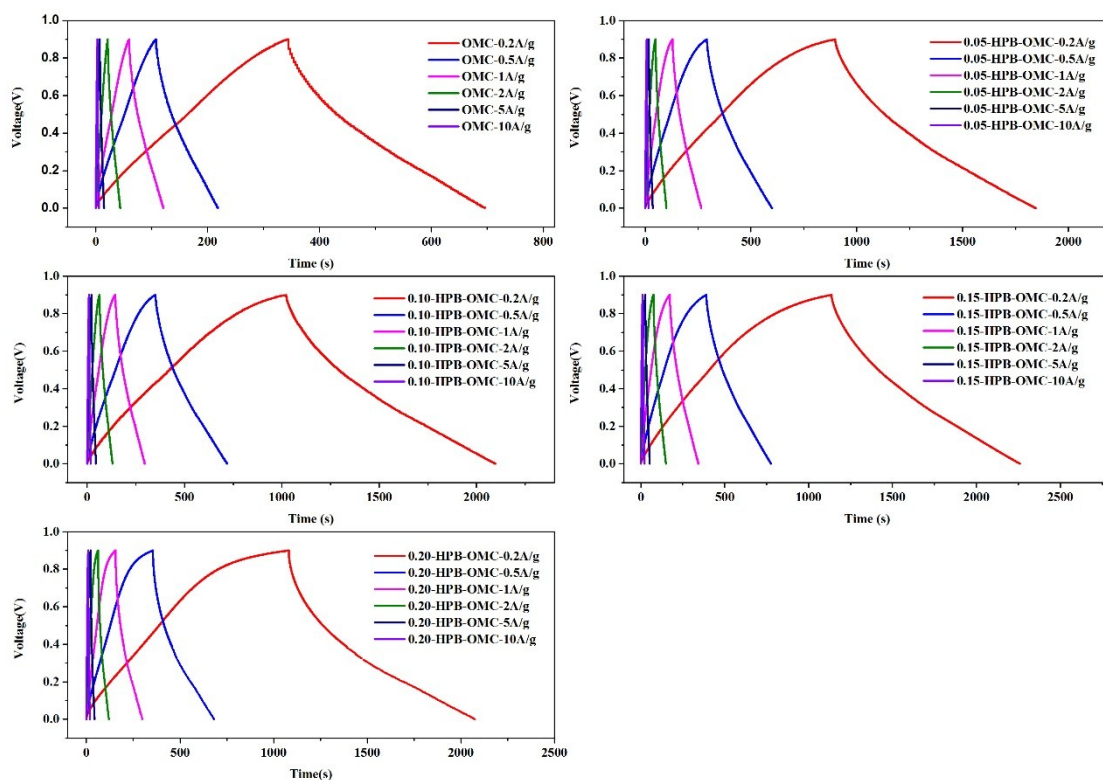

**Figure S2.** GCD curves of the (a) OMC, (b) 0.05-HPB-OMC, (c) 0.10-HPB-OMC, (d) 0.15-HPB-OMC, and (e) 0.20-HPB-OMC at the current density from 0.2 A·g<sup>-1</sup> to 10A·g<sup>-1</sup>.
